# Supplementary material for: p300-mediated Acetylation of Histone H3 Lysine 56 Functions in DNA Damage Response in Mammals
Source: PubMed Central journal article supplement — J Biol Chem. 2010 Jun 29;285(37):28553–64. doi: 10.1074/jbc.M110.149393 (PMC2937881; doi:10.1074/jbc.m110.149393), 2010-06-29
Supplement: supp_M110.149393_jbc.M110.149393-1.pdf [file supp_M110.149393_jbc.M110.149393-1.pdf]

## Supplemental Data

Figure S1.A

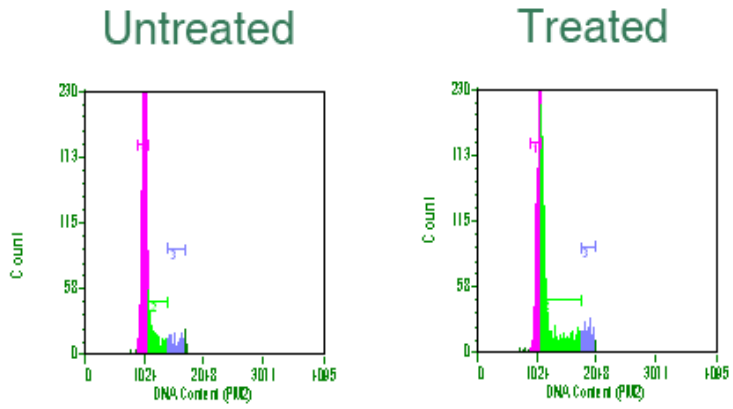

**Figure S1.A:** Flow cytometry analysis of DNA content of untreated and sodium butyrate treated Hela cells as described in materials and methods. The pink, green and blue peaks corresponds to cells in G1, S and G2/M phases of cell cycle respectively.

**Figure S1.B**

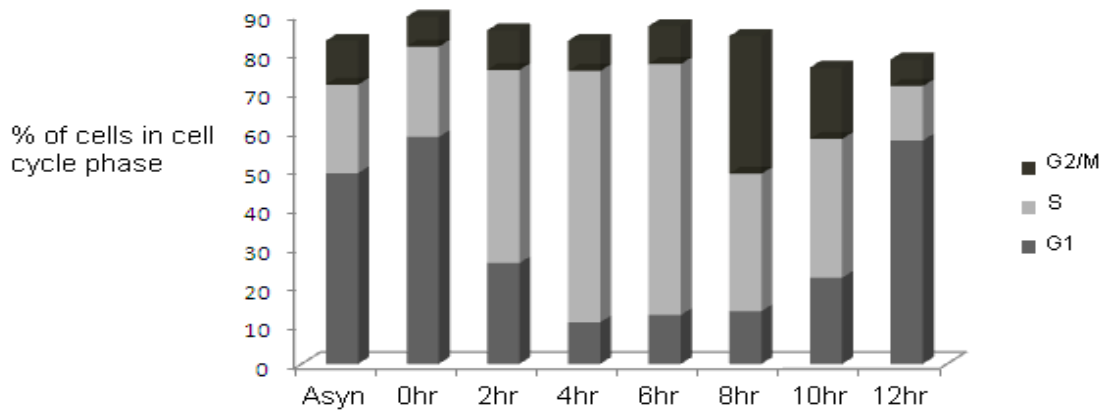

**Figure S1.B: Cell cycle analysis.** HeLa cells were synchronized by double thymidine block and released to proceed through the cell cycle as described in 'Experimental Procedures'. Cells were collected after thymidine treatment (0 h) and at indicated time points after release and cell cycle progression was analyzed by monitoring DNA content employing flow cytometry as described in 'Experimental Procedures'.

Figure S1C

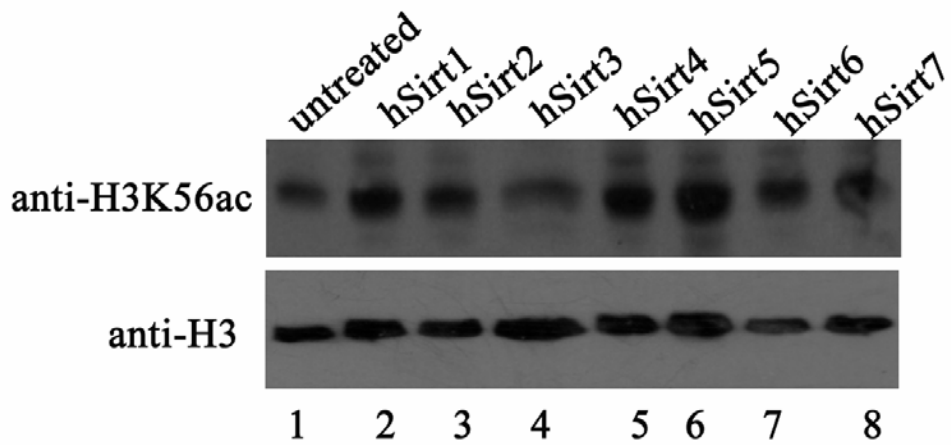

**Figure S1.C: *In vivo* deacetylation of H3K56 by sirtuins.** Sirtuins involved in the deacetylation of H3K56ac were tested by monitoring the reduction in level of H3K56 acetylation upon overexpression of seven human sirtuins, by transient transfection in HEK-293T cells as described in 'Experimental Procedures'. Immunoblot with anti-pan H3 was used as loading control.

**Figure S1.D**

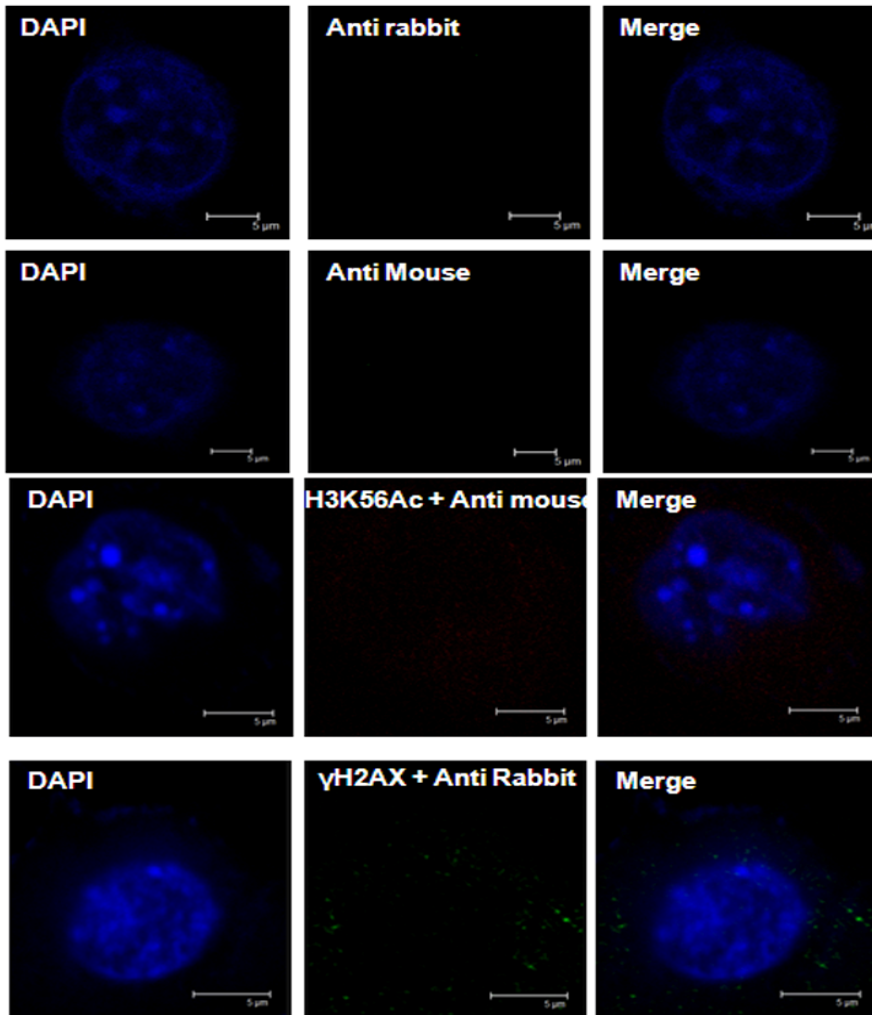

**Figure S2.D: Control experiments for coimmunofluorescence (Co-IF).** Top two panels depict a control experiment without primary antibodies showing there is no background staining caused by the secondary antibodies alone. HEK-293T cells were stained with Alexa Fluor 488-conjugated donkey anti-rabbit and Alexa Fluor 647-conjugated goat anti-mouse secondary antibodies without prior incubation with primary antibodies. Third and fourth rows show cells stained with anti-H3K56ac antibody in combination with AlexaFluor 647-coupled goat anti-mouse IgG and anti- $\gamma$ H2AX with AlexaFluor 488 coupled donkey anti-rabbit IgG, respectively, to show lack of cross reactivity.

**Figure S1.E**

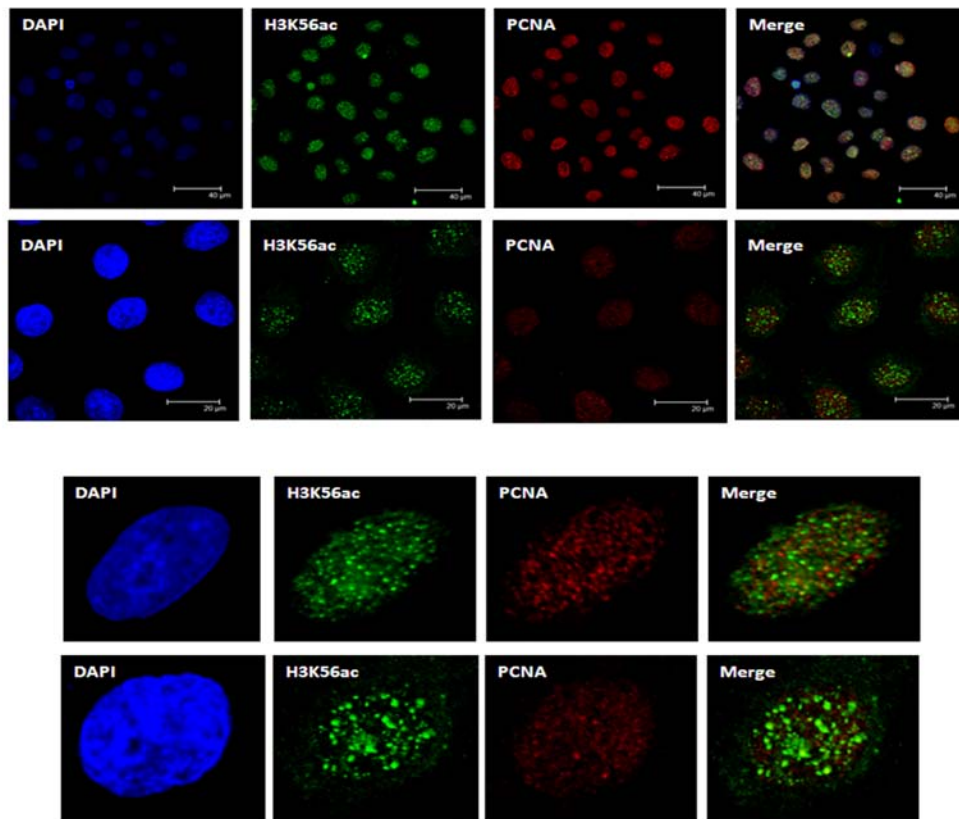

**Figure S1.E: Coimmunofluorescence showing localization of H3K56ac and PCNA in HeLa cells.** Asynchronous HeLa cells were coimmunostained with anti-H3K56ac antibody in combination with anti-PCNA antibody. Nuclei were stained with DAPI.

**Figure S2. A**

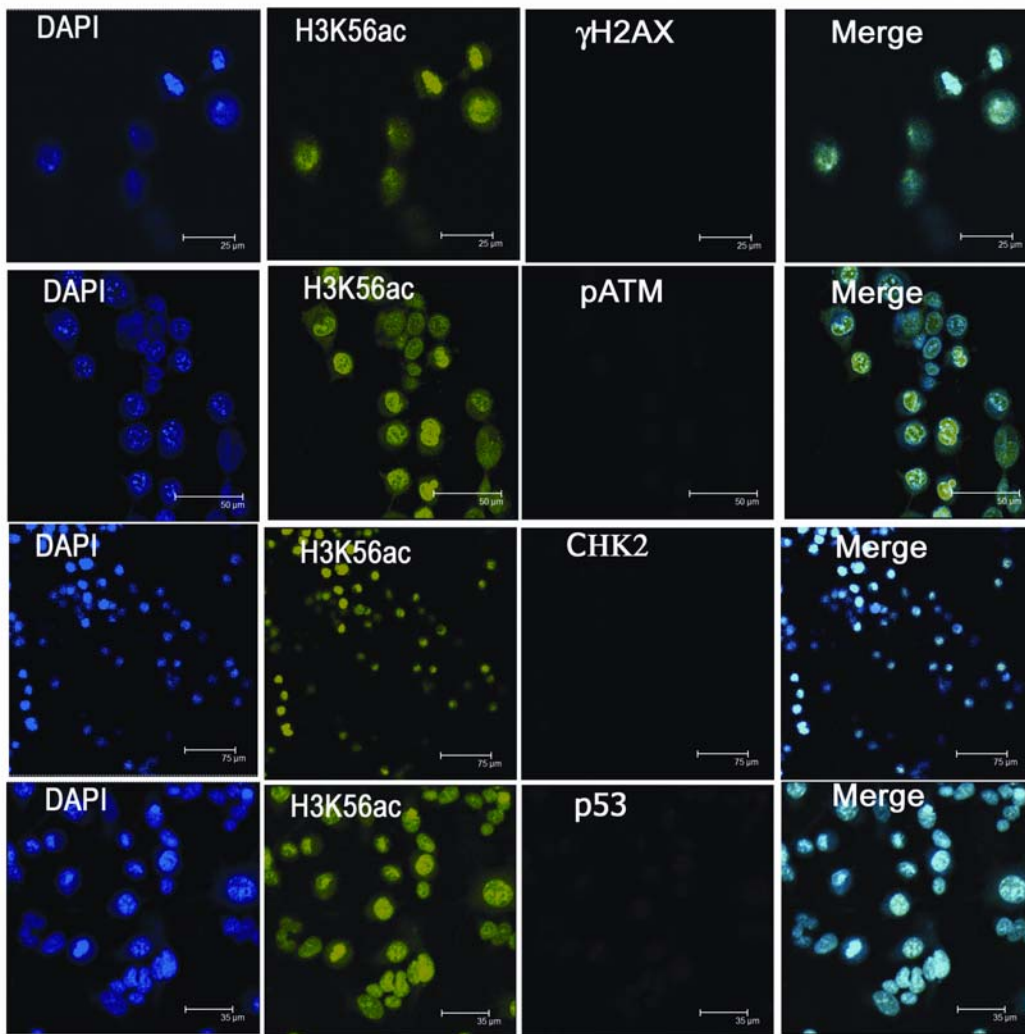

**Figure S2.A: A field of untreated HEK293 cells showing diffused H3 K56ac staining:** Untreated HEK293T cells immunostained with H3K56ac antibodies and antibodies against each of the indicated DNA DSB markers ( $\gamma$ -H2AX, pATM, Chk2 and p53).

**Figure S2. B**

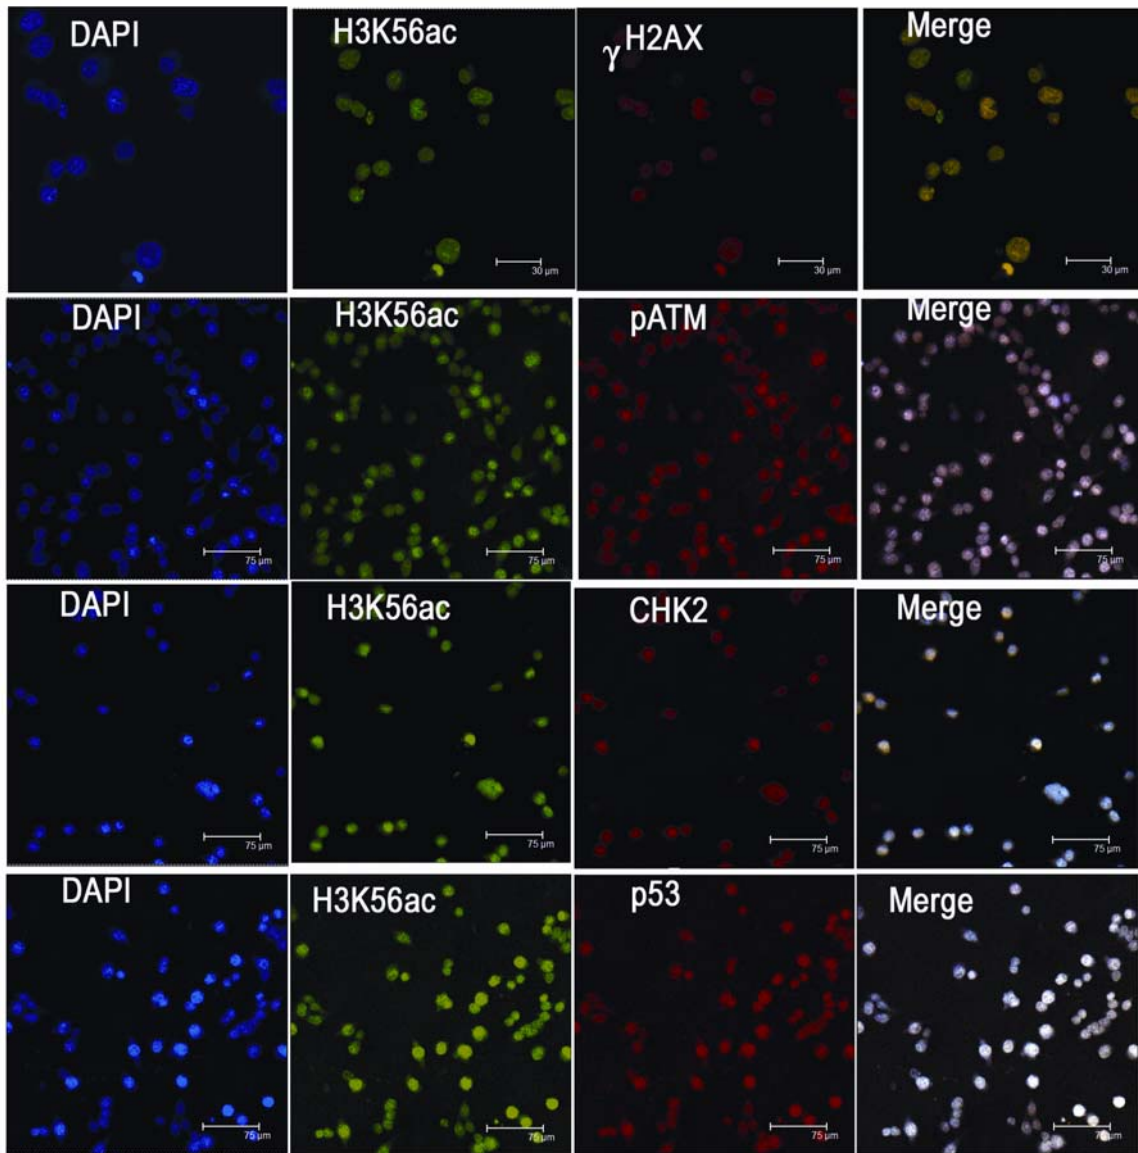

**Figure S2.B: Colocalization of H3K56ac with  $\gamma$ -H2AX, pATM, Chk2 and p53.** A field of MMS (0.02%) treated HEK293 cells immunostained with H3K56ac antibodies and antibodies against each of the indicated DNA DSB markers showing H3 K56ac.

**Figure S2.C**

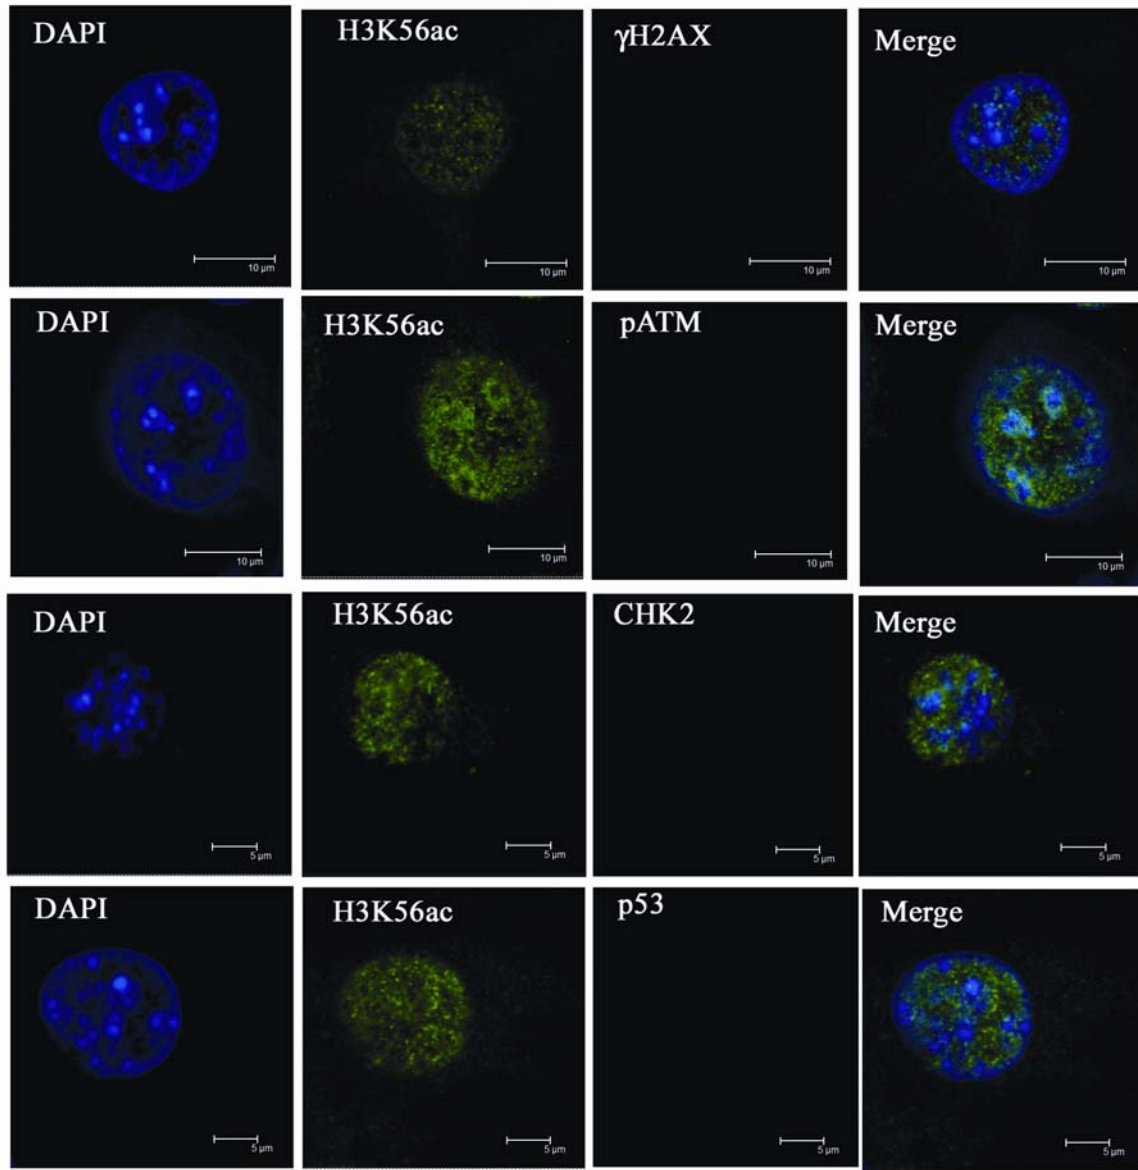

**Figure S2.C: Coimmunofluorescence of H3K56ac and  $\gamma$ -H2AX, pATM, Chk2 and p53 in untreated HEK293T cell.** A single untreated HEK293T cells immunostained with H3K56ac antibodies and antibodies against each of the indicated DNA DSB markers ( $\gamma$ -H2AX, pATM, Chk2 and p53).



**Figure S3**

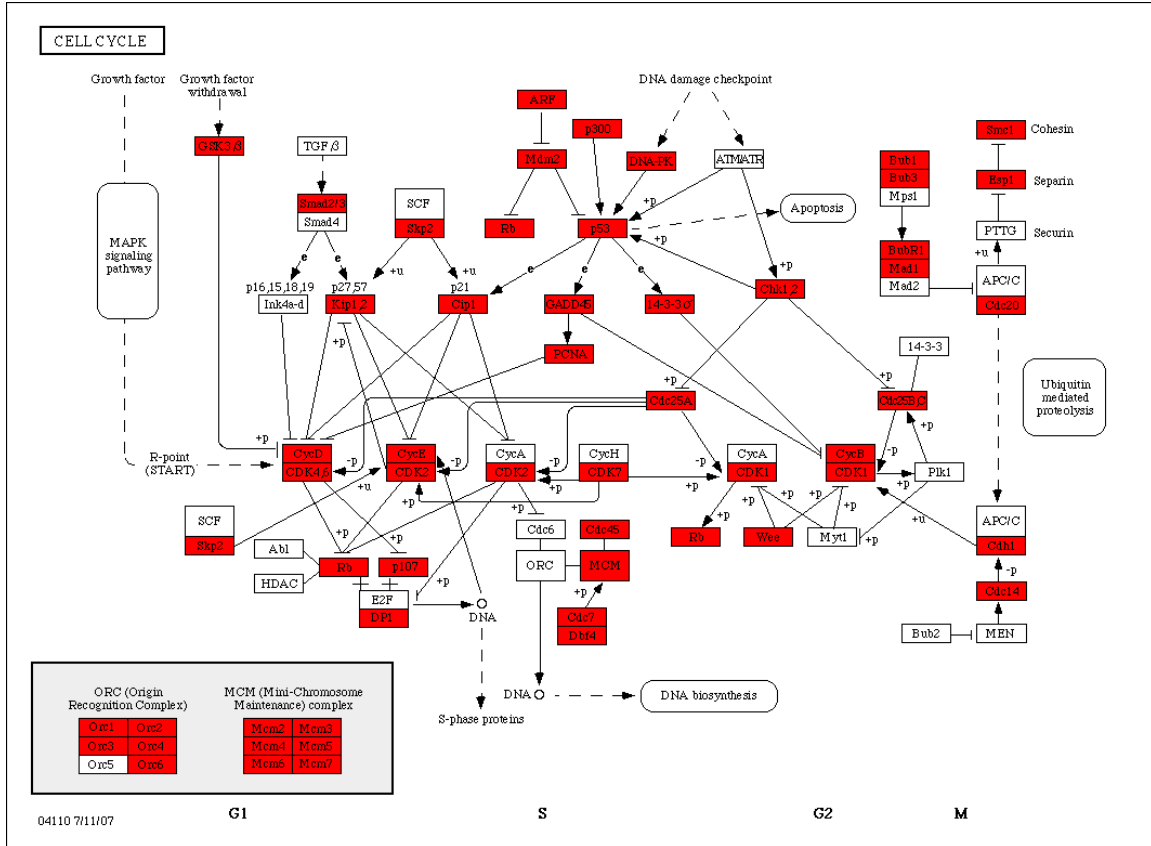

**Figure S3. Pathway analysis showing promoters of several genes in cell cycle pathway have elevated levels of H3K56ac.** ChIP on chip was carried out using anti-H3K56ac antibodies as described in experimental procedure. Pathway analysis of enriched gene promoters was carried out using gene spring software. Genes indicated in red have increased levels of H3K56ac at their promoters.

**Figure S4**

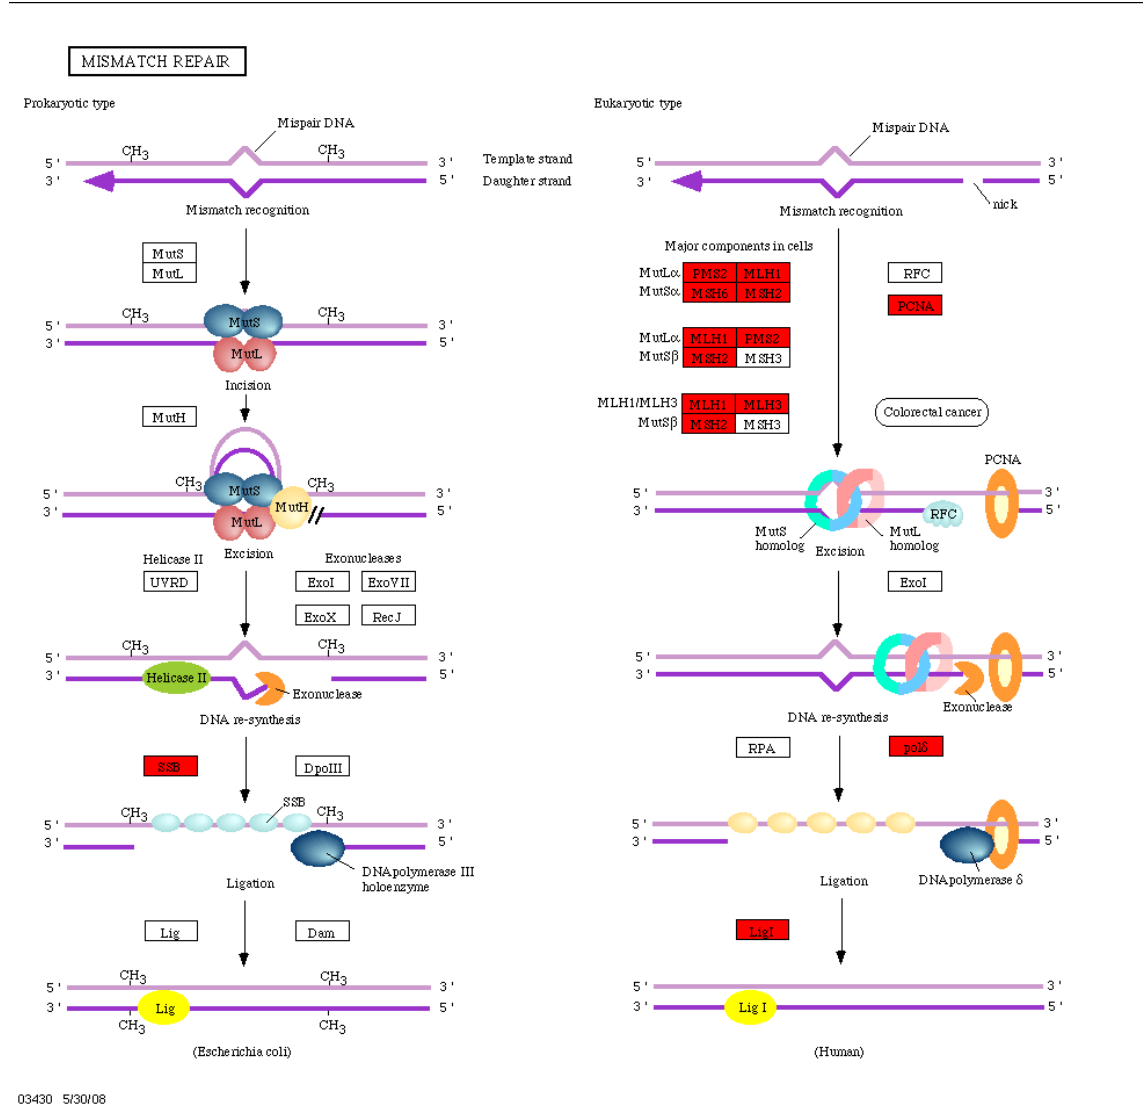

**Figure S4. Pathway analysis showing promoters of several genes in mismatch repair pathway have elevated levels of H3K56ac.** ChIP on chip was carried out using anti-H3K56ac antibodies as described in experimental procedure. Pathway analysis of enriched gene promoters was carried out using gene spring software. Genes indicated in red have increased levels of H3K56ac at their promoters.



**Figure S6**

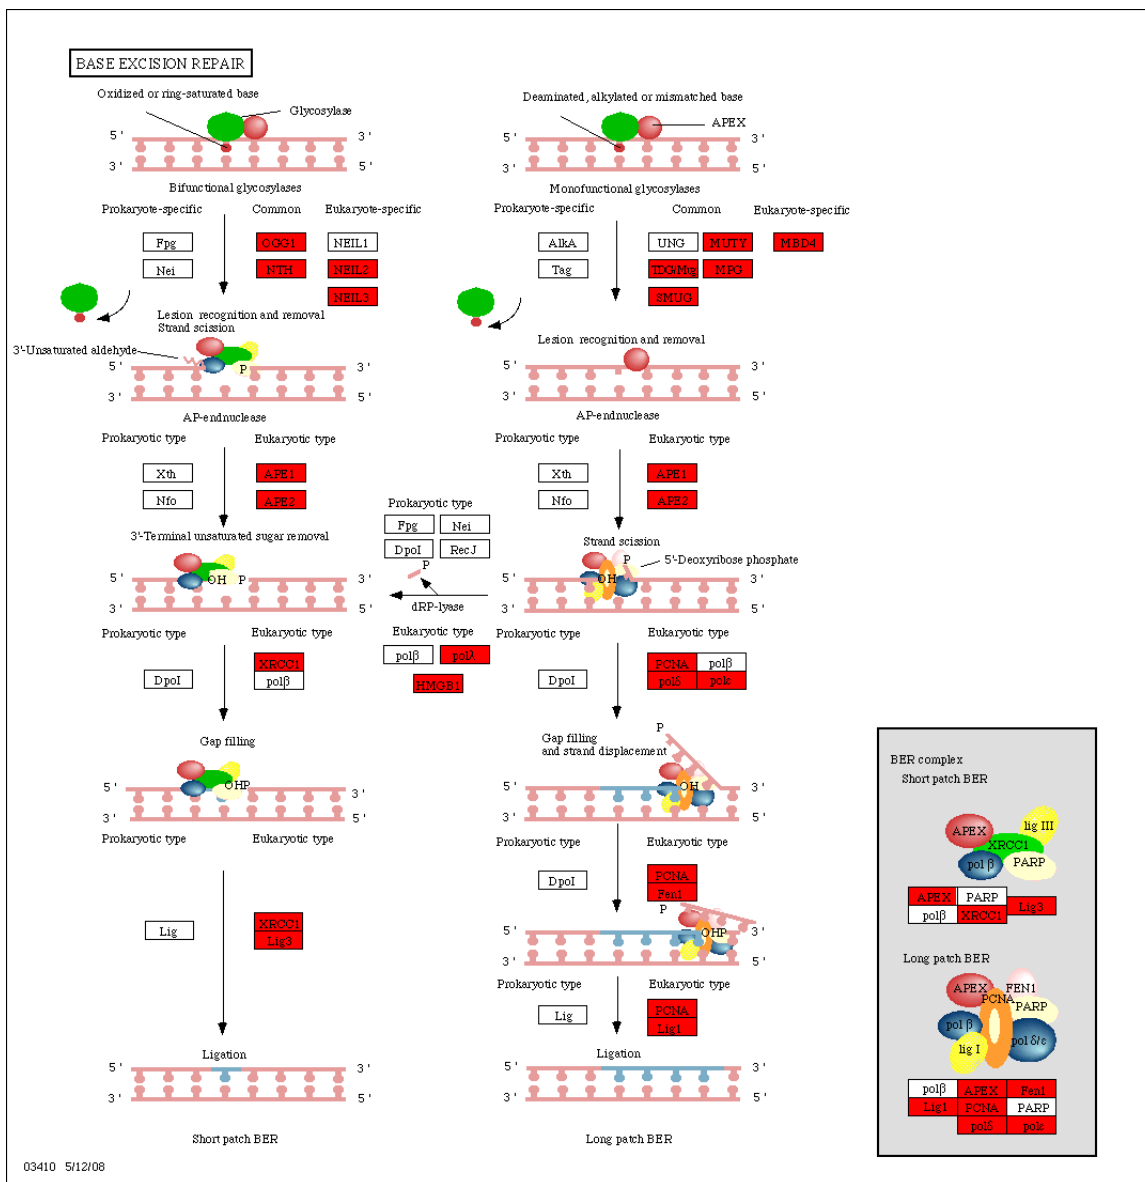

**Figure S6. Pathway analysis showing promoters of several genes in base excision repair pathway have elevated levels of H3K56ac.** ChIP on chip was carried out using anti-H3K56ac antibodies as described in experimental procedure. Pathway analysis of enriched gene promoters was carried out using gene spring software. Genes indicated in red have increased levels of H3K56ac at their promoters.

**Figure S7**

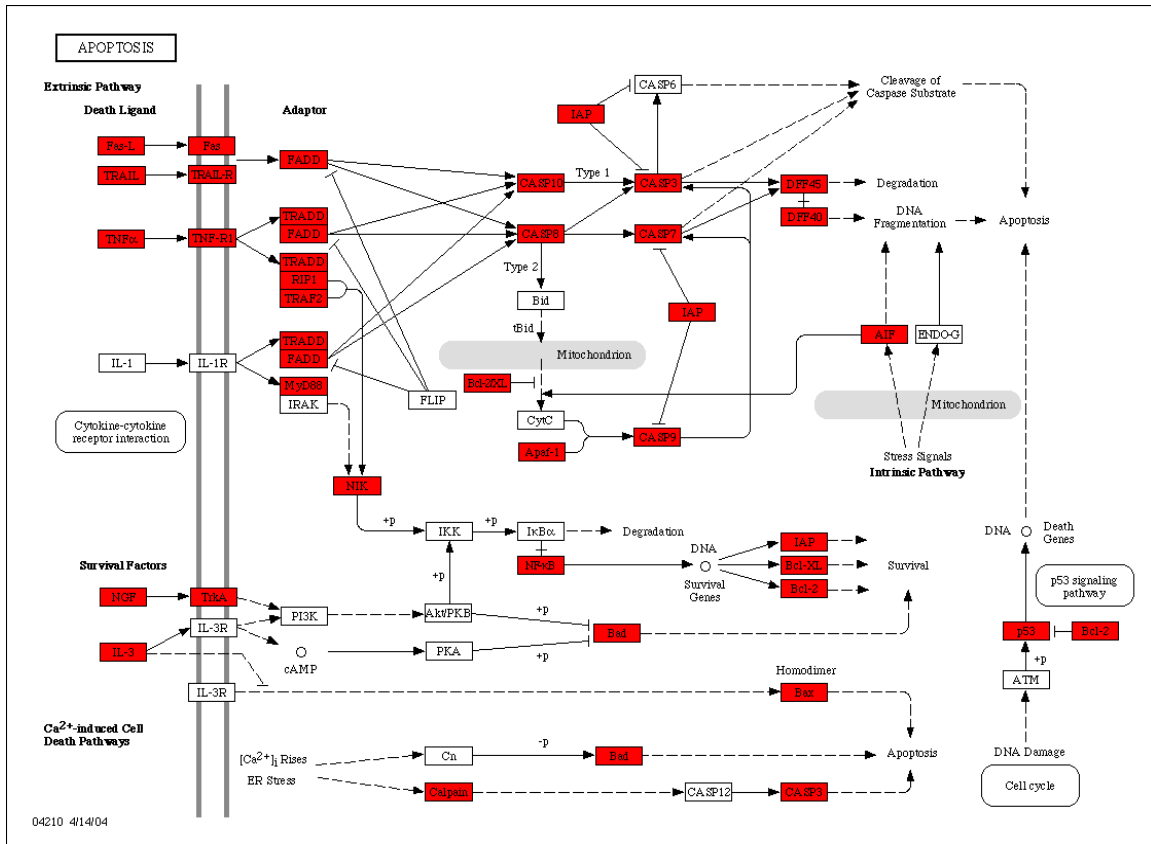

**Figure S7. Pathway analysis showing promoters of several genes in apoptosis pathway have elevated levels of H3K56ac.** ChIP on chip was carried out using anti-H3K56ac antibodies as described in experimental procedure. Pathway analysis of enriched gene promoters was carried out using gene spring software. Genes indicated in red have increased levels of H3K56ac at their promoters.

**Figure S8**

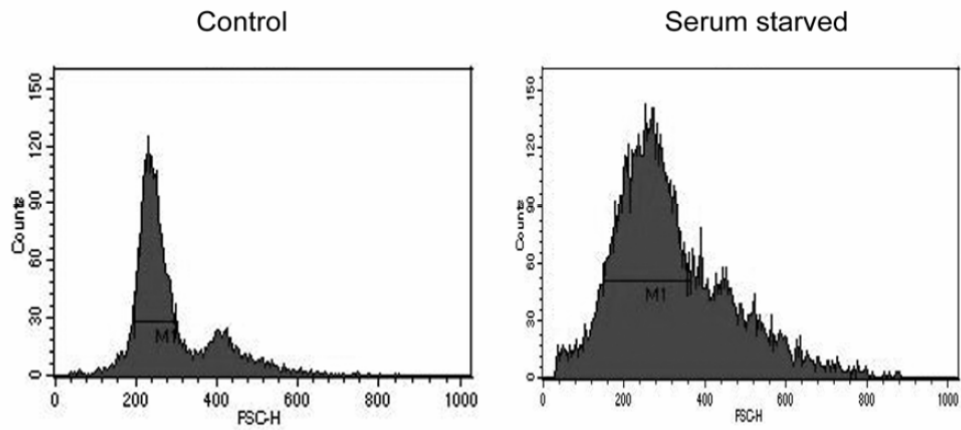

**Figure S8: Flow cytometry analysis of DNA content of control and serum-starved HaCaT cells.** Control and serum-starved HaCaT cells were subjected to flow cytometry analysis for total DNA content as described in 'Experimental Procedures'. M1 peak corresponds to cells in G1 phase of cell cycle and were 32 and 75% respectively.

**Figure S9**

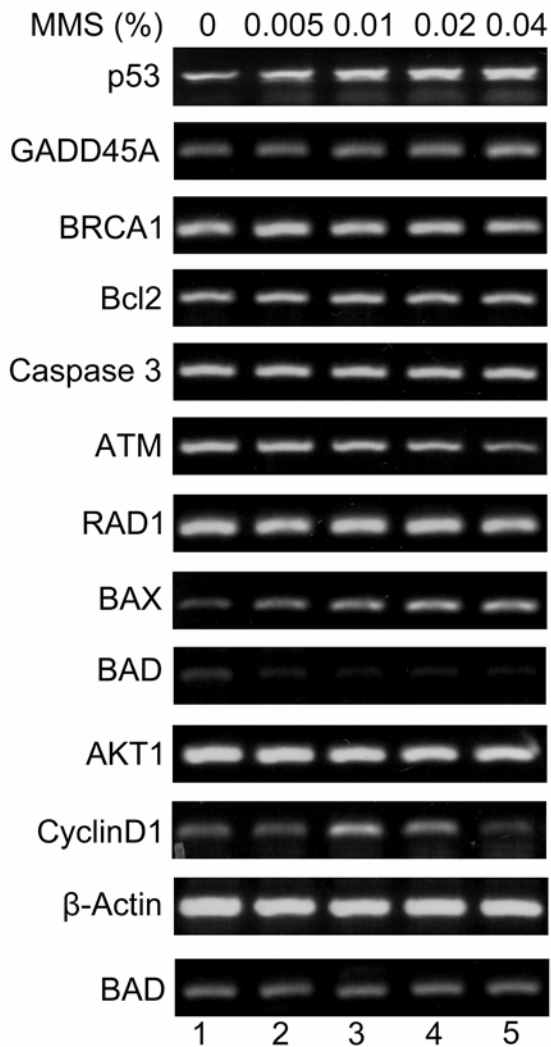

**Figure S9: MMS treatment alters expression of some of the genes involved in DNA damage response and cell cycle.** Jurkat cells were treated with .005 % (lane 1), .01 % (lane 2), .02 % (lane 3) and .04 % (lane 4) MMS for 2 h. RNA was then isolated and RT-PCR was performed for representative genes involved in cell cycle and DNA damage. Untreated cells (lane 1) represent the control. RT-PCR for  $\beta$ -actin served as control.

**Table S1.**

| S. No. | Gene/locus | Fold enrichment over IgG (ChIP in Jurkat) | Fold change upon serum starvation (in HaCaT) | Fold enrichment over IgG (ChIP in serum starved HaCaT) |
|--------|------------|-------------------------------------------|----------------------------------------------|--------------------------------------------------------|
| 1      | GPR174     | 315.2                                     | 4.67                                         | 12.06                                                  |
| 2      | L1CAM      | 52.0                                      | 2.21                                         | 1.23                                                   |
| 3      | PFTK1      | 9.2                                       | 1.46                                         | 6.34                                                   |
| 4      | CDH2       | 4.9                                       | 0.91                                         | 1.56                                                   |
| 5      | LBP        | 24.3                                      | 2.42                                         | 8.14                                                   |
| 6      | SERPINB7   | 12.1                                      | 1.58                                         | 1.52                                                   |
| 7      | MYCBP      | 16.0                                      | 2.07                                         | 3.37                                                   |
| 8      | ST7-I      | 36.8                                      | 2.87                                         | 6.41                                                   |
| 9      | ST7-II     | 32.0                                      | 1.23                                         | 4.02                                                   |
| 10     | ASZ1       | 21.1                                      | 3.3                                          | 4.12                                                   |
| 11     | DPT        | 26.0                                      | 1.97                                         | 2.1                                                    |
| 12     | OR51G1     | 9.20                                      | 1.76                                         | 5.72                                                   |
| 13     | DVL1       | 36.8                                      | 2.13                                         | 3.56                                                   |
| 14     | CTGF       | 16.0                                      | 0.86                                         | 2.53                                                   |
| 15     | GCC1       | 48.5                                      | 2.34                                         | 10.4                                                   |
| 16     | CTAGE1     | 9.2                                       | 4.02                                         | 3.73                                                   |
| 17     | SSTR1      | 9.8                                       | 1.45                                         | 1.02                                                   |
| 18     | EPC2       | 90.5                                      | 0.99                                         | 3.46                                                   |
| 19     | TLR4       | 2.8                                       | 2.78                                         | 0.11                                                   |
| 20     | HIST1H4L   | 68.6                                      | 2.03                                         | 1.07                                                   |
| 21     | HDAC9      | 45.3                                      | 1.89                                         | 3.18                                                   |
| 22     | A          | 1.12                                      |                                              |                                                        |
| 23     | B          | 0.97                                      |                                              |                                                        |
| 24     | C          | 1.03                                      |                                              |                                                        |
| 25     | D          | 0.97                                      |                                              |                                                        |
| 26     | E          | 1.03                                      |                                              |                                                        |

**Table S1: Pathway analysis for genomic regions enriched in H3K56ac.** ChIP-on-Chip analysis was performed as described in ‘Experimental Procedures’. Key pathways in which multiple genes were significantly hyperacetylated are listed.



**Table S2**

| <b>S. No.</b> | <b>Gene/locus</b> | <b>Fold enrichment over IgG (ChIP in Jurkat)</b> | <b>Fold change upon serum starvation (in HaCaT)</b> | <b>Fold enrichment over IgG (ChIP in serum starved HaCaT)</b> |
|---------------|-------------------|--------------------------------------------------|-----------------------------------------------------|---------------------------------------------------------------|
| 1             | GPR174            | 315.2                                            | 4.67                                                | 12.06                                                         |
| 2             | L1CAM             | 52.0                                             | 2.21                                                | 1.23                                                          |
| 3             | PFTK1             | 9.2                                              | 1.46                                                | 6.34                                                          |
| 4             | CDH2              | 4.9                                              | 0.91                                                | 1.56                                                          |
| 5             | LBP               | 24.3                                             | 2.42                                                | 8.14                                                          |
| 6             | SERPINB7          | 12.1                                             | 1.58                                                | 1.52                                                          |
| 7             | MYCBP             | 16.0                                             | 2.07                                                | 3.37                                                          |
| 8             | ST7-I             | 36.8                                             | 2.87                                                | 6.41                                                          |
| 9             | ST7-II            | 32.0                                             | 1.23                                                | 4.02                                                          |
| 10            | ASZ1              | 21.1                                             | 3.3                                                 | 4.12                                                          |
| 11            | DPT               | 26.0                                             | 1.97                                                | 2.1                                                           |
| 12            | OR51G1            | 9.20                                             | 1.76                                                | 5.72                                                          |
| 13            | DVL1              | 36.8                                             | 2.13                                                | 3.56                                                          |
| 14            | CTGF              | 16.0                                             | 0.86                                                | 2.53                                                          |
| 15            | GCC1              | 48.5                                             | 2.34                                                | 10.4                                                          |
| 16            | CTAGE1            | 9.2                                              | 4.02                                                | 3.73                                                          |
| 17            | SSTR1             | 9.8                                              | 1.45                                                | 1.02                                                          |
| 18            | EPC2              | 90.5                                             | 0.99                                                | 3.46                                                          |
| 19            | TLR4              | 2.8                                              | 2.78                                                | 0.11                                                          |
| 20            | HIST1H4L          | 68.6                                             | 2.03                                                | 1.07                                                          |
| 21            | HDAC9             | 45.3                                             | 1.89                                                | 3.18                                                          |
| 22            | A                 | 1.12                                             |                                                     |                                                               |
| 23            | B                 | 0.97                                             |                                                     |                                                               |
| 24            | C                 | 1.03                                             |                                                     |                                                               |
| 25            | D                 | 0.97                                             |                                                     |                                                               |
| 26            | E                 | 1.03                                             |                                                     |                                                               |

**Table S2: Quantitation of fold enrichment of H3K56ac occupancy at upstream regulatory regions of multiple genes in Jurkat and G1-arrested HaCaT cells.** Chromatin immunoprecipitation was performed as described in ‘Experimental Procedures’. Purified immunoprecipitated chromatin was subjected to PCR amplification using specific primers for the promoters of genes enriched in H3K56 acetylation, along with input chromatin. Quantitative RT PCRs were performed, for DNA immunoprecipitated from Jurkat cells and G1-arrested HaCaT cells (Column 3 and 5

respectively). Fold enrichment over the IgG is depicted. cDNA was prepared from G1-arrested cells (serum starved) and control cells and quantitative RT-PCRs were performed. Fold enrichment in expression for G1-arrested (serum starved HaCaT cells) over control cells, for indicated genes, is depicted in (Column 4). All quantitative RT-PCRs were performed using iCycler (BioRad) using iQ SYBR Green mix (BioRad).

**Table S3:**

| S. No. | Gene     | Chromosomal location | Primer         | Primer sequence       | Amplicon size (bp) | Position        | Nucleotide position relative to methionine |
|--------|----------|----------------------|----------------|-----------------------|--------------------|-----------------|--------------------------------------------|
| 1      | GPR174   | Chr X                | Forward primer | AAAAGCTGGAGGAAAATCCC  | 228                | Promoter        | -5033                                      |
|        |          |                      | Reverse primer | TCTGGCTGGCTATCAGTGTC  |                    |                 |                                            |
| 2      | L1CAM    | Chr X                | Forward primer | AAGCTCAGGGAGGATGGAAT  | 200                | Inside (intron) | +41829                                     |
|        |          |                      | Reverse primer | CAGACCTGCCTGAGTCACTG  |                    |                 |                                            |
| 3      | PFTK1    | Chr 7                | Forward primer | GTTTGCTTGCTGGGATGTTT  | 340                | Inside (intron) | +130353                                    |
|        |          |                      | Reverse primer | CCGCAGTCTTTTCACTCCT   |                    |                 |                                            |
| 4      | CDH2     | Chr 18               | Forward primer | GGGCTTTTTAAGTCTTGCTCC | 210                | Inside (intron) | +90049                                     |
|        |          |                      | Reverse primer | ATGCAGTCGTAAGCTTGGCT  |                    |                 |                                            |
| 5      | LBP      | Chr 20               | Forward primer | CTGCATTGGTTCTTGGGATT  | 247                | Promoter        | -3824                                      |
|        |          |                      | Reverse primer | ATGGCAGGAGGTCAGATGTC  |                    |                 |                                            |
| 6      | SERPINB7 | Chr 18               | Forward primer | GCTAAATTAGAGGCAGGCC   | 327                | Promoter        | -18313                                     |
|        |          |                      | Reverse primer | GGCCAAACCACTTTGTCCT   |                    |                 |                                            |
| 7      | MYCBP    | Chr 1                | Forward primer | TCTCTCTTTCAAACCCTCA   | 247                | Inside (intron) | +10342                                     |
|        |          |                      | Reverse primer | TGGCTGGTGCCTCTTCTAGT  |                    |                 |                                            |
| 8      | ST7-I    | Chr 7                | Forward primer | AGGAATGGGGAAACAAAGGT  | 294                | Promoter        | -5831                                      |
|        |          |                      | Reverse primer | AGGTTTGGGAAGGGAATTTGC |                    |                 |                                            |
| 9      | ST7-II   | Chr 7                | Forward primer | GCCTGGTCAGTGGAGCTTT   | 234                | Inside (intron) | +24726                                     |
|        |          |                      | Reverse primer | CCTGCAAGTCAGGAAGCAAC  |                    |                 |                                            |
| 10     | ASZ1     | Chr 7                | Forward primer | ACCAGACTCCAATGCCAATC  | 240                | Inside (intron) | +62733                                     |
|        |          |                      | Reverse primer | GAGAGAGGGTGGGAGAGGTC  |                    |                 |                                            |
| 11     | DPT      | Chr 1                | Forward primer | GTGGCCGCATAGAGAATGAT  | 259                | Promoter        | -3179                                      |

|    |          |                     |                |                                    |     |                 |       |
|----|----------|---------------------|----------------|------------------------------------|-----|-----------------|-------|
|    |          |                     | Reverse primer | GATGGAAGGCATTGCAGAAT               |     |                 |       |
| 12 | OR51G1   | Chr 11              | Forward primer | TGGCAAGGAAAGAGGAAGAA               | 287 | Promoter        | -1929 |
|    |          |                     | Reverse primer | CAGCTTCACTATGCCTGCTG               |     |                 |       |
| 13 | DVL1     | Chr 1               | Forward primer | GAACGGCTCAGGACCCC                  | 241 | Inside (exon)   | +244  |
|    |          |                     | Reverse primer | CTACCACATGGACGAGGAGG               |     |                 |       |
| 14 | CTGF     | Chr 6               | Forward primer | TAAGCTGGCCACTGAGTCCT               | 213 | Promoter        | -3368 |
|    |          |                     | Reverse primer | TCCTGCCAGGTTTTCTCTGT               |     |                 |       |
| 15 | GCC1     | Chr 7               | Forward primer | CAAAAGTCAAAAGCACAGGGA              | 299 | Inside (exon)   | +5080 |
|    |          |                     | Reverse primer | TTATGGGTTTAGTGGGCAGG               |     |                 |       |
| 16 | CTAGE1   | Chr 18              | Forward primer | CTCACTGGAAGGAAGGCAAG               | 234 | Inside (intron) | -3629 |
|    |          |                     | Reverse primer | ATGCCACTCCAGTCTCTGCT               |     |                 |       |
| 17 | SSTR1    | Chr 14              | Forward primer | TAGGAAAATCAGTGGGCCAG               | 225 | Promoter        | -5490 |
|    |          |                     | Reverse primer | ATGGCCTACAGCAAAGTTG                |     |                 |       |
| 18 | EPC2     | Chr 2               | Forward primer | TGCATACGCCATTCAAAAT                | 231 | Promoter        | -5596 |
|    |          |                     | Reverse primer | CAATCCCTGTGAAGGCAGTT               |     |                 |       |
| 19 | TLR4     | Chr 9               | Forward primer | CATCATACCAGGCCTCCATT               | 253 | Promoter        | -5456 |
|    |          |                     | Reverse primer | GTA CTGCCCTGTGCATCTCA              |     |                 |       |
| 20 | HIST1H4L | Chr 6               | Forward primer | GCCTGATGATAGCTCCAAGG               | 265 | Promoter        | -483  |
|    |          |                     | Reverse primer | AGGAACATGAGGGAGCTCAA               |     |                 |       |
| 21 | HDAC9    | Chr 7               | Forward primer | TGGGAGAAGAGGTAACATCAA              | 271 | Promoter        | -5490 |
|    |          |                     | Reverse primer | TGGAAACAAGCAAAGGAGGT               |     |                 |       |
| 22 | A        | 116243332-116244154 | Forward primer | GCCATCAGAATATTGAAAGAA<br>TGACCTC   | 682 | Promoter        | N/A   |
|    |          |                     | Reverse primer | CTGCTTGTTGCAGGTA CTTGCA<br>AATAG   |     |                 |       |
| 23 | B        | 59396319-59397663   | Forward primer | GGTTTGCTTAGGTGAGGTGCGG<br>CGGTGTGC | 650 | Promoter        | N/A   |

|    |   |                         |                |                                      |     |          |     |
|----|---|-------------------------|----------------|--------------------------------------|-----|----------|-----|
|    |   |                         | Reverse primer | GACCCTCCAGACCTCACGTTTG<br>TTCCGGAG   |     |          |     |
| 24 | C | 152133502-<br>152134181 | Forward primer | GGGCTGGGAGGAGTGGGAACAA<br>CATGGGCTC  | 668 | Promoter | N/A |
|    |   |                         | Reverse primer | CACTGGCCAGGCACTTTTCTGCC<br>TGG       |     |          |     |
| 25 | D | 4812338-<br>4813100     | Forward primer | GGAATTTAGAAGCTAACCCACAG<br>AAGAAGG   | 512 | Promoter | N/A |
|    |   |                         | Reverse primer | GAGGCTTAAGACTTCTCAGGGGT<br>TGCCTAG   |     |          |     |
| 26 | E | 117218625-<br>117219107 | Forward primer | GGATGGTTTTGGTGGCAGCTGAG<br>GGGAGGATG | 453 | Promoter | N/A |
|    |   |                         | Reverse primer | CCCAAAGTCCTCCGTCAAGAGAT<br>GTCTCGCC  |     |          |     |

**Supplemental Table 3. Oligonucleotides used for ChIP-PCR.** The oligonucleotides used for ChIP-PCR of the genes studied (represented by their official symbols in Figure 7A and C) are listed in the table. Also included are the chromosomal locations of the respective genes, the amplicon size, position of the amplicon (in promoter or in the exon/intron of the gene) and the position of the amplicon relative to ATG encoding initiator methionine. The oligonucleotides were designed after retrieving the 300 bp sequences, using UCSC Table Browser (Karolchik et al., 2004), flanking either side of the probes (40-60 mer) used in the microarray analysis. “+” or “-” indicate the relative location of amplicon (upstream and downstream, respectively) from the initiation site. Amplicons A-E (last five panels in Figure 7A) used as genomic controls were taken from the promoter regions identified by Kim et al. (2005).

**Table S4:**

| <b>S. No.</b> | <b>Gene</b> | <b>Chromosomal location</b> | <b>Primer type</b> | <b>Primer sequence</b> | <b>Amplicon size (bp)</b> | <b>Position</b> | <b>Full-length cDNA (nt)</b> | <b>Nucleotide position relative to methionine</b> |
|---------------|-------------|-----------------------------|--------------------|------------------------|---------------------------|-----------------|------------------------------|---------------------------------------------------|
| 1             | GPR174      | Chr X                       | Forward primer     | GTGCCAGGTCTCATAGGGAA   | 285                       | Inside          | 1002                         | 91                                                |
|               |             |                             | Reverse primer     | GCGAAAGGGGTACATGAGAA   |                           |                 |                              |                                                   |
| 2             | L1CAM       | Chr X                       | Forward primer     | GTGAGTGCCATCATCCTCCT   | 328                       | Inside          | 3774                         | 3379                                              |
|               |             |                             | Reverse primer     | CCTTCTCCTTCTTGCCACTG   |                           |                 |                              |                                                   |
| 3             | PFTK1       | Chr 7                       | Forward primer     | CCAAGGAGTTGCTGCTTTTC   | 253                       | Inside          | 1356                         | 924                                               |
|               |             |                             | Reverse primer     | TGCCGACAGTCTGTTCTTTG   |                           |                 |                              |                                                   |
| 4             | CDH2        | Chr 18                      | Forward primer     | CCATCACTCGGCTTAATGGT   | 242                       | Inside          | 2721                         | 1958                                              |
|               |             |                             | Reverse primer     | GATGATGATGCAGAGCAGGA   |                           |                 |                              |                                                   |
| 5             | LBP         | Chr 20                      | Forward primer     | AACTTCAGCCCTGGGAATCT   | 324                       | Inside          | 1446                         | 1048                                              |
|               |             |                             | Reverse primer     | CTGAACACGCTTCAGCAGAG   |                           |                 |                              |                                                   |
| 6             | SERPINB7    | Chr 18                      | Forward primer     | ACGTTCTGCTGCCTGAGAAT   | 345                       | Inside          | 1143                         | 713                                               |
|               |             |                             | Reverse primer     | TGGACTGAGGGAGTTGCTTT   |                           |                 |                              |                                                   |
| 7             | MYCBP       | Chr 1                       | Forward primer     | GCCGCCGACTCGAAGCGTGAG  | 276                       | Inside          | 312                          | 16                                                |

|    |        |        |                |                        |     |        |      |      |
|----|--------|--------|----------------|------------------------|-----|--------|------|------|
|    |        |        | Reverse primer | CTGAGGTGGTTCATACTGAGC  |     |        |      |      |
| 8  | ST7-I  | Chr 7  | Forward primer | TGCACACTGGAAGAGAGTGG   | 261 | Inside | 1665 | 1278 |
|    |        |        | Reverse primer | AACTGATGTGTCAGGAGGGC   |     |        |      |      |
| 9  | ST7-II | Chr 7  | Forward primer | GAGGGGTTGACAACAACCTCTC | 310 | Inside | 1758 | 317  |
|    |        |        | Reverse primer | GCTTCATGAGCTGCAGAAATCC |     |        |      |      |
| 10 | ASZ1   | Chr 7  | Forward primer | GAGAGTAGCGAGAGCGAGGA   | 233 | Inside | 1428 | 46   |
|    |        |        | Reverse primer | TCTGCATTGGCAACACTAGC   |     |        |      |      |
| 11 | DPT    | Chr 1  | Forward primer | GGCTTCAGCTACCAGTGTCC   | 304 | Inside | 606  | 133  |
|    |        |        | Reverse primer | TTAGCCAGCAGGAATATGGG   |     |        |      |      |
| 12 | OR51G1 | Chr 11 | Forward primer | ACCTCACCATTCTCCACGTC   | 323 | Inside | 966  | 131  |
|    |        |        | Reverse primer | CACTGAGCTTAGCCCCATCT   |     |        |      |      |
| 13 | DVL1   | Chr 1  | Forward primer | GGAAGCAGCGCCTTCGGCAG   | 251 | Inside | 2013 | 671  |
|    |        |        | Reverse primer | CACGTCATTACCTGCAGC     |     |        |      |      |
| 14 | CTGF   | Chr 6  | Forward primer | CCGTA CTCCCAAATCTCCA   | 237 | Inside | 1050 | 771  |
|    |        |        | Reverse primer | AAGATGTCATTGTCTCCGGG   |     |        |      |      |
| 15 | GCC1   | Chr 7  | Forward primer | GCACCTACGAGAAAGCCAAG   | 255 | Inside | 2328 | 1133 |
|    |        |        | Reverse primer | CCAGGTCACAGAGCTTCTCC   |     |        |      |      |
| 16 | CTAGE1 | Chr 18 | Forward primer | CCCTCAAATCACAAGTAGCTG  | 275 | Inside | 2238 | 455  |
|    |        |        | Reverse primer | CTTTAGCAAGCGTTCAGTCAG  |     |        |      |      |
| 17 | SSTR1  | Chr 14 | Forward primer | GGGCTATCTGCCTGTGCTAC   | 294 | Inside | 1176 | 710  |
|    |        |        | Reverse primer | GGAAAGAGCGCTTGAAGTTG   |     |        |      |      |
| 18 | EPC2   | Chr 2  | Forward primer | GGGGGTATCACAGAAGAGCA   | 287 | Inside | 2424 | 1726 |
|    |        |        | Reverse primer | GGCTGGACAACACCGTTTAT   |     |        |      |      |
| 19 | TLR4   | Chr 9  | Forward primer | CCAGGATGAGGACTGGGTAA   | 294 | Inside | 1920 | 1446 |
|    |        |        | Reverse primer | CTGAGCAGGGTCTTCTCCAC   |     |        |      |      |

|    |                |       |                |                      |     |        |      |     |
|----|----------------|-------|----------------|----------------------|-----|--------|------|-----|
| 20 | HIST1H4L       | Chr 6 | Forward primer | AGGGTCTGGGCAAAGGAG   | 230 | Inside | 312  | 26  |
|    |                |       | Reverse primer | CATGGCTGTGACTGTCTTGC |     |        |      |     |
| 21 | HDAC9          | Chr 7 | Forward primer | CAGTTCTCCAGGCTCTGGTC | 343 | Inside | 3201 | 804 |
|    |                |       | Reverse primer | AGTAACATGAGGGTGGCTGG |     |        |      |     |
| 22 | $\beta$ -actin | Chr 7 | Forward primer | TGGAATCCTGTGGCATCCA  | 257 | Inside | 1128 | 806 |
|    |                |       | Reverse primer | TAACAGTCCGCCTAGAAGCA |     |        |      |     |

**Supplemental Table 4. Oligonucleotides used for quantitative RT-PCR.** The oligonucleotides used for quantitative RT-PCR (for the genes represented by their official symbols in Figure 7B) are listed in the table, along with the chromosomal location of the respective genes, the amplicon size, position of the amplicon (which is always inside the coding region), size of full-length cDNA and the position of the amplicon relative to ATG encoding initiator methionine.
